# Supplementary material for: The NICU Antibiotics and Outcomes (NANO) trial: a randomized multicenter clinical trial assessing empiric antibiotics and clinical outcomes in newborn preterm infants
Source: PubMed Central journal article supplement (PMC9125935; doi:10.1186/s13063-022-06352-3), 2022-05-23

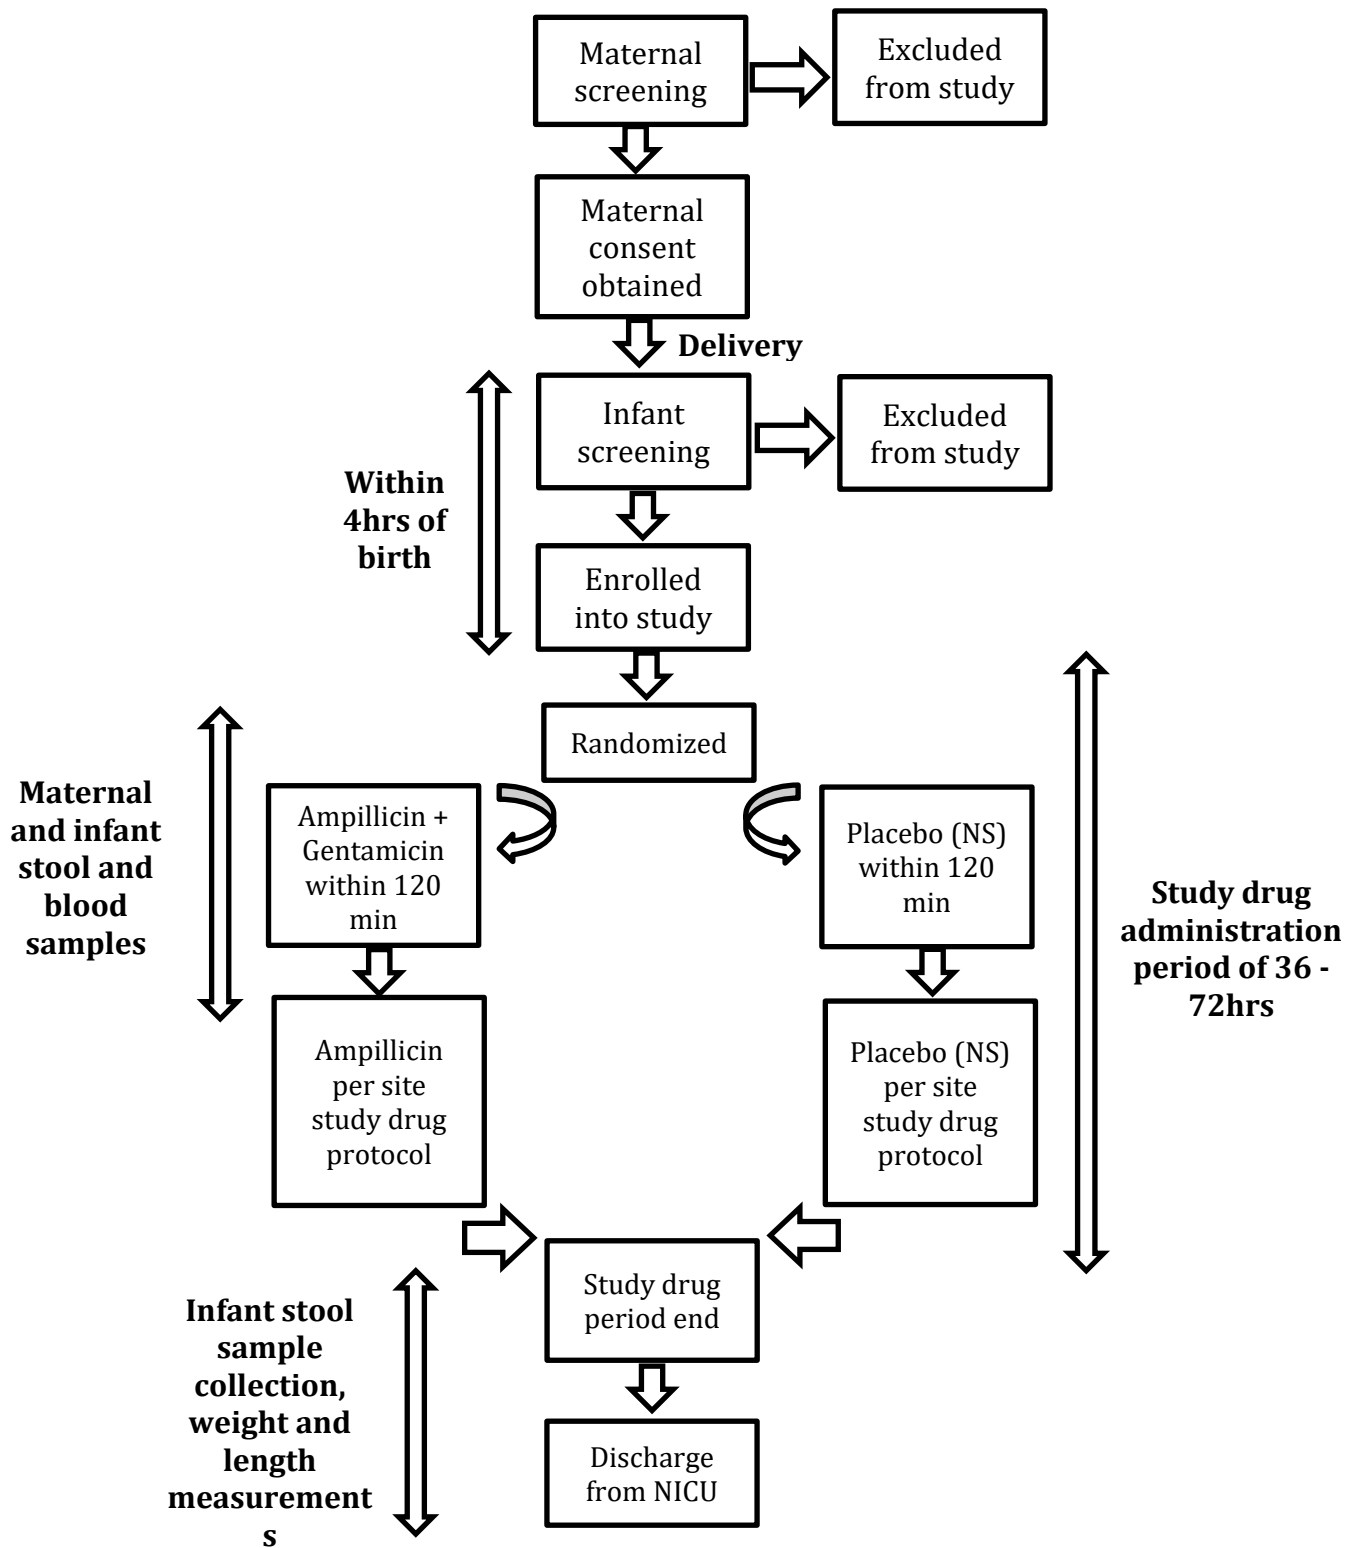

Supplement: 13063_2022_6352_MOESM1_ESM.pdf [file 13063_2022_6352_MOESM1_ESM.pdf]
